# Supplementary material for: Computed Tomography-Based Radiomics in Predicting T Stage and Length of Esophageal Squamous Cell Carcinoma
Source: Front Oncol. 2021 Oct 14;11:722961. doi: 10.3389/fonc.2021.722961 (PMC8553111; doi:10.3389/fonc.2021.722961)
Supplement: Supplementary file 1 [file Table_1.xlsx]

## Sheet: radiomic features
Patients	L1-GLCM-Contrast	L1-GLCM-Correlation	L1-GLCM-Energy	L1-GLCM-Homogeneity	L1-GLCM-Mean	L1-GLCM-Variance	L1-GLCM-Std	L1-GLCM-Dissimilarity	L1-GLCM-Entropy	L1-GLCM-Sum_average	L1-GLCM-Difference_average	L1-GLCM-Sum_variance	L1-GLCM-Difference_variance	L1-GLCM-Sum_Entropy	L1-GLCM-Difference_Entropy	L1-GLCM-Information_Measures_I	L1-GLCM-Information_Measures_II	L1-GLCM-Maximal_Correlation_Coefficient	L1-GLCM-Homogeneity_Original	L1-GLCM-Correlation_Original	L1-HIST-mean-scaled	L1-HIST-median-scaled	L1-HIST-variance-scaled	L1-HIST-entropy-scaled	L1-HIST-skewness-scaled	L1-HIST-kurtosis-scaled	L1-HIST-max-scaled	L1-HIST-std-scaled	L1-HIST-range-scaled	L1-HIST-mean-absolute	L1-HIST-median-absolute	L1-HIST-variance-absolute	L1-HIST-skewness-absolute	L1-HIST-kurtosis-absolute	L1-HIST-min-absolute	L1-HIST-max-absolute	L1-HIST-std-absolute	L1-HIST-range-absolute	L1-LL_GLCM-Contrast	L1-LL_GLCM-Correlation	L1-LL_GLCM-Energy	L1-LL_GLCM-Homogeneity	L1-LL_GLCM-Mean	L1-LL_GLCM-Variance	L1-LL_GLCM-Std	L1-LL_GLCM-Dissimilarity	L1-LL_GLCM-Entropy	L1-LL_GLCM-Sum_average	L1-LL_GLCM-Difference_average
1	0.699017	0.781255	0.186648	0.796537	29.2264	1.69671	1.27431	0.459809	2.29643	58.4527	0.459809	6.08784	0.476839	1.9125	0.836939	-0.313609	0.751232	0.0599626	0.790338	0.781255	123.391	125	95.0568	4.87788	-2.98423	19.5861	169	9.74971	169	1041.74	1052	2316.11	-2.99509	19.6436	432	1265	48.126	833	0.584473	0.809493	0.208366	0.824478	29.3556	1.63071	1.2498	0.394806	2.18879	58.7113	0.394806
2	0.654134	0.531317	0.266306	0.803492	29.5904	0.716651	0.827396	0.434196	1.85524	59.1807	0.434196	2.21247	0.461511	1.5052	0.784622	-0.176163	0.542479	0.0774681	0.799672	0.531317	83.6974	84	41.7026	4.36443	-3.76457	40.7083	116	6.45776	116	1056.63	1059	930.4	-3.77946	40.8686	661	1210	30.5025	549	0.441434	0.642371	0.328042	0.860077	29.6973	0.612965	0.770951	0.307985	1.64438	59.3945	0.307985
3	0.603847	0.714758	0.206931	0.809302	28.4725	1.09271	1.04037	0.422893	2.132	56.9451	0.422893	3.767	0.418528	1.79606	0.79681	-0.304929	0.723481	0.0582089	0.804588	0.714758	84.5892	86	75.2643	4.8001	-2.10116	17.5365	133	8.6755	133	1037.96	1045	1873.85	-2.09373	17.4809	616	1278	43.2879	662	0.523595	0.747831	0.244648	0.837269	28.558	1.07441	1.03128	0.363277	2.02474	57.116	0.363277
4	0.677251	0.620062	0.202746	0.7896	28.8714	0.95588	0.943688	0.462534	2.11868	57.7427	0.462534	3.14627	0.453004	1.73036	0.808732	-0.219464	0.623825	0.0585553	0.785016	0.620062	134.571	135	60.7412	4.74877	-2.7129	33.8479	183	7.79367	183	1057.94	1060	1573.31	-2.72461	34.0046	373	1303	39.6649	930	0.470983	0.711315	0.25503	0.846627	29.1154	0.856403	0.892012	0.333651	1.8995	58.2307	0.333651
5	0.86472	0.661238	0.163301	0.755255	29.5115	1.38132	1.15485	0.555905	2.32189	59.0229	0.555905	4.66055	0.548731	1.84953	0.904861	-0.20977	0.636303	0.076088	0.747706	0.661238	100.185	102	82.0748	4.81315	-3.2799	24.2839	139	9.05951	139	1054.23	1061	1938.66	-3.28311	24.3117	567	1245	44.0302	678	0.584855	0.747578	0.2198	0.823367	29.8666	1.25942	1.09909	0.39475	2.05192	59.7331	0.39475
6	0.462982	0.695994	0.282943	0.854109	29.3893	0.90838	0.8959	0.319389	1.74517	58.7786	0.319389	3.17054	0.353889	1.50396	0.674959	-0.297945	0.668186	0.0933048	0.851632	0.695994	122.666	124	58.7635	4.43963	-5.14548	55.5401	152	7.66573	152	1062.99	1067	1284.68	-5.14364	55.5447	489	1198	35.8424	709	0.386203	0.736186	0.324743	0.87982	29.4173	0.867666	0.874775	0.265059	1.62947	58.8345	0.265059
7	0.399011	0.628072	0.369193	0.876301	30.1329	0.675173	0.753652	0.272632	1.50946	60.2658	0.272632	2.30168	0.313788	1.31733	0.610657	-0.315023	0.638719	0.0370548	0.873854	0.628072	106.563	108	54.0399	4.31986	-5.01387	50.8945	129	7.35118	129	1043.75	1048	1073.45	-5.03311	51.1803	568	1143	32.7635	575	0.359184	0.665453	0.415736	0.899831	30.1856	0.675804	0.751111	0.226942	1.40287	60.3712	0.226942
8	0.532297	0.582188	0.226633	0.813197	29.9807	0.722857	0.813105	0.403393	1.90275	59.9613	0.403393	2.35913	0.357681	1.58103	0.75245	-0.219888	0.593044	0.0240461	0.80962	0.582188	81.7866	83	51.4063	4.60936	-2.32696	16.2027	110	7.16982	110	1063.47	1068	1122.6	-2.33339	16.2219	681	1197	33.5052	516	0.401119	0.667122	0.307866	0.861873	30.2086	0.678311	0.783071	0.300303	1.70659	60.4172	0.300303
9	0.489328	0.644052	0.249266	0.837227	28.8511	0.704904	0.822477	0.354895	1.87678	57.7022	0.354895	2.33029	0.356671	1.5882	0.720604	-0.285314	0.673111	0.0948073	0.833871	0.644052	60.6269	62	48.3501	4.55564	-1.56129	12.4636	98	6.95342	98	1084.18	1091	1193.36	-1.54842	12.3624	783	1272	34.5451	489	0.389956	0.701138	0.300245	0.871056	28.903	0.666315	0.796513	0.283323	1.73525	57.8061	0.283323
10	0.826868	0.643835	0.229383	0.811689	29.7362	1.26573	1.08055	0.445578	2.00293	59.4723	0.445578	4.23604	0.619951	1.65565	0.825931	-0.244827	0.646116	0.122135	0.806003	0.643835	113.822	115	76.3585	4.51727	-4.64656	38.9317	146	8.73834	146	1055.55	1062	1699.17	-4.64944	38.9335	518	1209	41.221	691	0.617167	0.713012	0.284536	0.853904	30.0099	1.16558	1.03797	0.344933	1.82762	60.0199	0.344933
11	0.357025	0.575714	0.286391	0.846129	28.3522	0.430676	0.651803	0.317333	1.6404	56.7043	0.317333	1.36568	0.254121	1.39651	0.655819	-0.222165	0.57283	0.0123089	0.844834	0.575714	64.8921	65	23.5582	4.20911	-0.67172	16.4545	117	4.85368	117	1058.64	1059	630.92	-0.68024	16.6682	722	1328	25.1181	606	0.256559	0.655333	0.370699	0.889359	28.5663	0.386949	0.615363	0.228485	1.45236	57.1326	0.228485
12	0.774183	0.594173	0.170557	0.769603	28.2439	1.01864	0.991714	0.522107	2.22657	56.4879	0.522107	3.30036	0.492406	1.79098	0.886212	-0.218135	0.63919	0.0891984	0.762074	0.594173	64.1195	65	63.1006	4.67613	-1.73684	14.2378	111	7.94359	111	1041.64	1047	1571.42	-1.73288	14.2514	722	1277	39.6412	555	0.686323	0.618164	0.226005	0.80024	28.1802	0.967098	0.96737	0.457016	2.09554	56.3604	0.457016
13	12.5989	0.796118	0.044159	0.518798	22.7334	33.523	5.46687	2.25512	4.2468	45.4667	2.25512	121.493	6.69887	3.18762	1.86823	-0.334442	0.889395	0.136793	0.46563	0.796118	127.873	150	2027.77	6.72105	-1.19038	3.34007	218	45.0307	218	869.829	984	55957.2	-1.19007	3.34004	198	1345	236.553	1147	10.6558	0.821768	0.0420071	0.515419	22.9192	32.0965	5.35416	2.16182	4.30669	45.8383	2.16182
14	0.877339	0.682033	0.168832	0.791126	29.3875	1.34448	1.14286	0.483993	2.31963	58.775	0.483993	4.50058	0.631821	1.92049	0.849491	-0.301537	0.742043	0.0341773	0.784833	0.682033	119.593	121	107.322	5.04353	-3.30736	28.1945	147	10.3596	147	1063.91	1070	2326.02	-3.31918	28.2945	507	1192	48.2288	685	0.796855	0.711183	0.170878	0.803143	29.4134	1.35277	1.14414	0.454193	2.28109	58.8268	0.454193
15	0.522288	0.676781	0.206905	0.806372	29.6814	0.894587	0.916404	0.415028	2.10982	59.3627	0.415028	3.05606	0.342818	1.7601	0.769976	-0.270206	0.682528	0.0963611	0.802376	0.676781	70.9639	72	62.827	4.78954	-1.93382	12.6856	106	7.92635	106	1057.8	1064	1435.04	-1.94133	12.7408	718	1226	37.882	508	0.426805	0.726849	0.241105	0.836713	29.843	0.85847	0.89339	0.347017	1.98921	59.686	0.347017
16	0.593662	0.580628	0.233511	0.808159	27.5467	0.7417	0.825678	0.418045	1.94564	55.0933	0.418045	2.37314	0.405462	1.60549	0.768259	-0.210789	0.595575	0.0330108	0.804438	0.580628	101.923	102	41.1792	4.43645	-2.23063	32.167	168	6.41711	168	1061.87	1064	1289.12	-2.2393	32.2571	491	1434	35.9043	943	0.442455	0.677913	0.289803	0.860795	27.9799	0.697602	0.795895	0.305067	1.75059	55.9597	0.305067
17	0.697081	0.510669	0.165496	0.748785	28.9573	0.738887	0.855115	0.544465	2.19158	57.9146	0.544465	2.25847	0.394991	1.70273	0.866283	-0.142795	0.516827	0.0207436	0.742051	0.510669	81.5185	82	41.1668	4.54956	-1.46048	15.1899	137	6.41614	137	1045.42	1048	1113.9	-1.45501	15.1342	621	1333	33.3752	712	0.441244	0.626567	0.247826	0.825802	29.1108	0.621526	0.781554	0.366425	1.85236	58.2215	0.366425
18	1.12887	0.642876	0.209879	0.800914	29.5506	1.95956	1.2997	0.482014	2.08799	59.1013	0.482014	6.70938	0.884801	1.74171	0.829208	-0.267544	0.676349	0.0450872	0.795986	0.642876	158.994	161	138.496	4.70711	-6.441	65.5381	204	11.7684	204	1048.02	1057	3425.48	-6.42371	65.3482	258	1272	58.5276	1014	0.870304	0.708445	0.266603	0.843576	29.6355	1.85759	1.26414	0.383128	1.92592	59.2709	0.383128
19	0.465774	0.569545	0.306144	0.842278	29.1186	0.561622	0.718829	0.338916	1.62792	58.2372	0.338916	1.78071	0.341033	1.37328	0.679318	-0.219657	0.564115	0.0558919	0.84017	0.569545	63.6869	64	25.8998	3.9818	-2.456	39.0825	130	5.08918	130	1049.76	1052	784.622	-2.47013	39.2036	698	1414	28.0111	716	0.350009	0.662192	0.388945	0.888502	29.1599	0.527542	0.695945	0.243446	1.43047	58.3198	0.243446
20	0.729915	0.541337	0.246058	0.801247	29.085	0.901693	0.901707	0.445823	1.91422	58.17	0.445823	2.87686	0.524427	1.55939	0.80405	-0.180195	0.552791	0.0698145	0.796959	0.541337	115.446	116	56.7199	4.54072	-4.35893	47.8597	165	7.53126	165	1043.16	1047	1438.29	-4.40113	48.4703	460	1293	37.9248	833	0.532375	0.643786	0.275229	0.851246	29.3177	0.83603	0.870159	0.333279	1.73802	58.6355	0.333279
21	0.475605	0.725797	0.239933	0.849264	29.7084	0.830426	0.874014	0.324249	1.88578	59.4168	0.324249	2.8461	0.361557	1.63618	0.663178	-0.339517	0.726619	0.0229651	0.847444	0.725797	159.039	160	74.0917	4.80605	-4.4404	56.1663	191	8.60765	191	1052.11	1058	1630.99	-4.43823	56.123	306	1201	40.3856	895	0.403273	0.763202	0.27839	0.876777	29.7624	0.806359	0.856673	0.267613	1.76187	59.5248	0.267613
22	0.773387	0.605867	0.257209	0.824025	29.5514	1.28451	1.01962	0.40385	1.83066	59.1027	0.40385	4.36464	0.603444	1.52973	0.759429	-0.223632	0.596636	0.0833678	0.820635	0.605867	181.347	182	77.5069	4.4323	-8.09751	115.82	209	8.8038	209	1070.43	1074	1698.84	-8.12259	116.255	221	1199	41.2169	978	0.576947	0.680047	0.330893	0.870713	29.7525	1.16049	0.960514	0.300889	1.62281	59.5049	0.300889
23	0.352538	0.620581	0.269346	0.844973	28.9543	0.477354	0.687355	0.318846	1.73682	57.9086	0.318846	1.55688	0.247492	1.48927	0.65222	-0.259726	0.628172	0.0311085	0.843706	0.620581	32.2657	32	25.6776	4.3057	0.164742	8.96158	83	5.06731	83	1097.58	1098	729.607	0.172528	9.10503	925	1369	27.0112	444	0.297253	0.679803	0.267055	0.867468	29.1759	0.477041	0.687724	0.271973	1.67683	58.3518	0.271973
24	0.720918	0.643345	0.20359	0.784945	28.7132	1.05038	1.00826	0.484589	2.16447	57.4265	0.484589	3.4806	0.472144	1.7513	0.843675	-0.229981	0.642088	0.0866384	0.77832	0.643345	49.943	51	47.3472	4.5211	-0.615063	17.4833	130	6.88093	130	1067.88	1074	1735.71	-0.617755	17.5672	765	1552	41.6619	787	0.521356	0.714454	0.24268	0.829065	28.9202	0.950973	0.960507	0.377865	1.99782	57.8404	0.377865
25	1.74562	0.577188	0.152934	0.722532	29.8829	2.2052	1.46477	0.72054	2.46519	59.7657	0.72054	7.07516	1.21197	1.90992	1.05859	-0.190537	0.624395	0.0335485	0.709174	0.577188	153.85	157	167.274	5.00343	-4.33104	33.2045	181	12.9335	181	1055.46	1068	3537.15	-4.33398	33.2233	347	1179	59.4739	832	1.42109	0.641834	0.205408	0.773578	30.182	2.11436	1.4381	0.593635	2.28227	60.364	0.593635
26	0.673409	0.636994	0.238162	0.812005	29.5287	1.00649	0.960304	0.420165	1.96444	59.0574	0.420165	3.35253	0.490248	1.63543	0.777133	-0.252042	0.64834	0.0419537	0.807925	0.636994	144.746	146	80.4756	4.62529	-5.5554	66.536	170	8.97082	170	1054.48	1059	1677.15	-5.5635	66.6787	393	1170	40.953	777	0.557764	0.696498	0.287602	0.850488	29.5213	0.973927	0.940221	0.337715	1.8147	59.0426	0.337715
27	0.508426	0.670593	0.229568	0.82391	29.5177	0.783735	0.880275	0.382682	1.98593	59.0355	0.382682	2.62651	0.357203	1.66807	0.753231	-0.276372	0.676825	0.0426277	0.820037	0.670593	72.2898	73	50.7386	4.68493	-1.4994	10.9882	105	7.1231	105	1084.42	1088	1188.07	-1.50168	11.0222	734	1241	34.4683	507	0.393165	0.724056	0.276175	0.858442	29.5768	0.729765	0.84907	0.305589	1.84091	59.1536	0.305589
28	0.754314	0.615703	0.218162	0.779262	28.0364	1.17229	1.01901	0.495057	2.05754	56.0728	0.495057	3.93485	0.497448	1.64962	0.849802	-0.188658	0.58008	0.121026	0.773366	0.615703	102.127	103	68.496	4.62846	-3.42684	34.9666	163	8.27623	163	1059.74	1064	2012.07	-3.43914	35.0814	506	1388	44.8561	882	0.547719	0.694216	0.295216	0.837632	28.0026	1.0715	0.966733	0.363604	1.80604	56.0052	0.363604
29	0.414646	0.572047	0.257823	0.826697	28.8626	0.499829	0.701449	0.359225	1.74109	57.7252	0.359225	1.58467	0.282856	1.46879	0.693964	-0.212898	0.574686	0.0441507	0.825075	0.572047	66.1981	66	30.1385	4.3123	-0.582145	21.7755	127	5.48986	127	1063.51	1065	894.703	-0.594263	21.8865	703	1394	29.9116	691	0.294833	0.671889	0.340731	0.87834	29.0197	0.461382	0.673724	0.252633	1.54427	58.0394	0.252633
30	0.699177	0.57103	0.206375	0.792237	28.5167	0.931305	0.894648	0.457597	1.99733	57.0334	0.457597	3.02604	0.47547	1.62894	0.793404	-0.191574	0.575989	0.0570376	0.788297	0.57103	116.386	117	55.9251	4.56032	-4.1713	48.5685	162	7.47831	162	1042.99	1046	1373.6	-4.1413	48.1452	467	1267	37.0621	800	0.520969	0.650983	0.274063	0.847205	28.6097	0.852062	0.852011	0.3384	1.77531	57.2195	0.3384
31	0.48966	0.577284	0.297267	0.839774	30.4664	0.620357	0.766931	0.342928	1.64599	60.9329	0.342928	1.99177	0.36758	1.3968	0.683046	-0.225582	0.572197	0.0303835	0.83797	0.577284	122.922	124	47.4322	4.32412	-6.30108	91.3917	147	6.8871	147	1050.6	1055	970.583	-6.32052	91.7483	494	1159	31.1542	665	0.386786	0.651245	0.40852	0.889355	30.6527	0.591563	0.747802	0.243498	1.40469	61.3055	0.243498
32	0.994916	0.59483	0.255575	0.803056	30.1695	1.34966	1.11781	0.4847	1.97782	60.339	0.4847	4.40373	0.7447	1.6146	0.866795	-0.220428	0.612016	0.0589355	0.795615	0.59483	132.09	134	96.8438	4.64963	-4.20869	31.4086	153	9.84092	153	1053.41	1062	1949.48	-4.20214	31.3519	461	1148	44.1529	687	0.756886	0.660756	0.326886	0.841689	30.4278	1.22674	1.06412	0.389689	1.82074	60.8556	0.389689
33	1.12237	0.617077	0.205195	0.78246	29.7097	1.54348	1.22375	0.52823	2.13964	59.4194	0.52823	5.05156	0.835923	1.72356	0.898204	-0.212537	0.622538	0.0351782	0.775431	0.617077	134.17	136	107.158	4.72143	-5.18556	47.9481	166	10.3517	166	1041.14	1048	2307.71	-5.19314	48.0168	418	1189	48.0386	771	0.826241	0.687697	0.280208	0.844514	29.8207	1.39453	1.16569	0.385284	1.88257	59.6415	0.385284
34	0.314662	0.596229	0.286638	0.848196	30.0377	0.409153	0.635107	0.306336	1.62931	60.0753	0.306336	1.32195	0.219087	1.40063	0.629614	-0.234189	0.58338	0.032197	0.847665	0.596229	24.5785	25	24.5348	4.29354	-0.34068	4.93355	55	4.95326	55	1085.25	1087	565.74	-0.34736	4.94841	967	1231	23.7853	264	0.220845	0.696416	0.343785	0.892735	30.0946	0.37816	0.610417	0.216056	1.44913	60.1893	0.216056
35	0.295954	0.709867	0.310953	0.867514	28.9396	0.522443	0.720224	0.272374	1.66121	57.8792	0.272374	1.79382	0.219715	1.44643	0.612769	-0.325616	0.683134	0.0459106	0.866165	0.709867	25.3519	26	29.3589	4.2449	-0.601516	8.12182	73	5.41839	73	1076.19	1081	782.913	-0.607159	8.17989	945	1324	27.9806	379	0.23406	0.757745	0.3563	0.893645	28.9725	0.494374	0.700372	0.21773	1.54097	57.945	0.21773
36	0.441143	0.69203	0.206126	0.826681	28.7827	0.752249	0.85807	0.365457	1.99498	57.5655	0.365457	2.56785	0.304527	1.70981	0.717066	-0.304361	0.706889	0.042683	0.824209	0.69203	80.9785	81	50.8427	4.70639	-1.22114	12.4917	122	7.13041	122	1054.66	1056	1217.88	-1.2288	12.5061	658	1254	34.8981	596	0.33382	0.753129	0.259829	0.871726	28.8433	0.707367	0.831375	0.271985	1.80237	57.6867	0.271985
37	0.644877	0.65383	0.245451	0.799782	30.349	0.979931	0.978269	0.445359	2.00241	60.6979	0.445359	3.27485	0.439335	1.63595	0.81147	-0.233086	0.632519	0.0587794	0.794488	0.65383	86.3516	88	77.2724	4.87924	-2.16279	12.5546	107	8.79047	107	1040.12	1047	1504.17	-2.16564	12.5738	659	1130	38.7836	471	0.507309	0.707232	0.326967	0.842557	30.5388	0.905856	0.941738	0.350661	1.80395	61.0777	0.350661
38	0.729717	0.722885	0.268392	0.845504	29.2797	1.32638	1.09351	0.372035	1.93038	58.5593	0.372035	4.5758	0.56567	1.6574	0.745618	-0.353187	0.738979	0.0140015	0.840358	0.722885	113.633	115	87.9005	4.65699	-3.96336	29.4833	157	9.37553	157	1069.18	1078	2203.68	-3.97789	29.6391	499	1285	46.9434	786	0.642594	0.744977	0.309518	0.863447	29.2474	1.28154	1.0755	0.332193	1.84002	58.4947	0.332193
39	1.02477	0.590713	0.226569	0.802868	30.2206	1.45449	1.08598	0.473528	1.9792	60.4412	0.473528	4.79318	0.774509	1.61999	0.82928	-0.216772	0.605557	0.119014	0.797459	0.590713	192.697	194	114.174	4.74249	-5.99561	66.5072	213	10.6852	213	1048.08	1056	2246.39	-6.00288	66.5994	193	1136	47.396	943	0.787896	0.665538	0.308754	0.852681	30.447	1.35104	1.04602	0.361593	1.77285	60.8939	0.361593
40	0.820238	0.635802	0.139588	0.747377	28.8787	1.16902	1.05954	0.568474	2.40019	57.7574	0.568474	3.85583	0.481829	1.89479	0.907642	-0.208137	0.644206	0.126226	0.738712	0.635802	62.26	63	85.6082	5.11151	-1.08387	6.58183	114	9.25247	114	1019.26	1024	2134.27	-1.08231	6.52338	709	1275	46.1981	566	0.575375	0.716097	0.192513	0.812132	29.3133	1.04542	1.00007	0.415774	2.15469	58.6266	0.415774
41	0.42202	0.694609	0.310447	0.864557	28.1518	0.719264	0.809807	0.295773	1.71428	56.3035	0.295773	2.45504	0.32756	1.49291	0.641268	-0.340744	0.705529	0.0563796	0.862314	0.694609	59.4039	60	40.7012	4.18591	2.19599	47.9338	142	6.37975	142	1072.04	1075	1554.08	2.19311	47.9895	705	1582	39.4218	877	0.377878	0.727054	0.323932	0.878933	28.2665	0.705482	0.800933	0.26605	1.669	56.533	0.26605
42	0.694572	0.58011	0.326431	0.842729	30.5097	0.868372	0.904442	0.366148	1.73479	61.0194	0.366148	2.77892	0.554978	1.46713	0.731345	-0.257537	0.619623	0.0575523	0.838842	0.58011	125.597	127	66.7153	4.46284	-4.97962	50.6548	146	8.16794	146	1033.43	1040	1283.16	-5.00213	50.92	482	1124	35.8212	642	0.561921	0.646511	0.394691	0.876451	30.4698	0.84037	0.889877	0.293548	1.57062	60.9396	0.293548
43	0.56551	0.573194	0.255237	0.816068	29.4676	0.690079	0.808399	0.395722	1.84838	58.9353	0.395722	2.19481	0.403965	1.53225	0.743119	-0.206927	0.576882	0.0582768	0.813301	0.573194	142.61	143	46.0596	4.49069	-3.98905	51.696	175	6.78672	175	1050.25	1052	1017.61	-4.00864	52.0301	379	1205	31.9001	826	0.404079	0.675769	0.340705	0.877276	29.644	0.639096	0.77422	0.2688	1.60608	59.288	0.2688
44	0.546853	0.661427	0.289452	0.846904	29.0685	0.886044	0.917341	0.340015	1.72316	58.137	0.340015	2.99732	0.427951	1.47397	0.696703	-0.269771	0.637476	0.0552709	0.844337	0.661427	146.261	147	49.5901	4.17675	-6.65396	90.5251	206	7.04202	206	1031.61	1036	1369.23	-6.68616	91.0183	262	1347	37.0031	1085	0.425599	0.725798	0.363078	0.889561	29.1661	0.844951	0.894162	0.251381	1.54566	58.3322	0.251381
45	0.576743	0.539229	0.241267	0.803315	29.0035	0.662174	0.794587	0.428145	1.90687	58.007	0.428145	2.07195	0.383698	1.54885	0.785576	-0.184186	0.553039	0.0536262	0.798886	0.539229	83.084	84	35.7403	4.32797	-2.2571	21.3282	140	5.97832	140	1050.43	1055	997.647	-2.26879	21.4647	611	1354	31.5855	743	0.410198	0.629762	0.315977	0.855369	29.0901	0.585203	0.74733	0.312247	1.68849	58.1803	0.312247
46	0.668124	0.687585	0.204093	0.789232	29.3637	1.12459	1.0465	0.467416	2.13193	58.7274	0.467416	3.83025	0.444252	1.74677	0.834056	-0.239462	0.655464	0.119507	0.783844	0.687585	82.2151	84	70.5247	4.7287	-2.66501	17.3709	115	8.3979	115	1041.47	1048	1540.47	-2.6717	17.3961	657	1197	39.2488	540	0.478889	0.758497	0.273405	0.849599	29.4902	1.04089	1.00658	0.334484	1.89159	58.9803	0.334484
47	0.686607	0.708695	0.187407	0.796373	28.1407	1.3354	1.11346	0.456761	2.17776	56.2814	0.456761	4.65497	0.470067	1.80762	0.82537	-0.269	0.691216	0.0625681	0.791022	0.708695	84.7121	86	64.9848	4.59501	-3.27585	27.1591	150	8.06131	150	1055.88	1062	1998.12	-3.27617	27.1983	586	1420	44.7004	834	0.547322	0.756607	0.240119	0.83742	28.2978	1.2656	1.07979	0.366165	2.00882	56.5957	0.366165
48	0.452508	0.599916	0.260176	0.834404	28.1283	0.572305	0.753697	0.351468	1.76935	56.2566	0.351468	1.83671	0.325297	1.49463	0.698894	-0.244083	0.614666	0.0183937	0.832294	0.599916	69.7217	70	29.8873	4.20804	-1.14345	26.706	141	5.46692	141	1042.3	1046	945.555	-1.15717	26.8951	649	1444	30.7499	795	0.347267	0.672242	0.336053	0.878396	28.3068	0.538477	0.729928	0.261272	1.5748	56.6137	0.261272
49	0.526359	0.648472	0.272753	0.840249	30.0219	0.797604	0.860399	0.351993	1.76664	60.0439	0.351993	2.66406	0.396423	1.49325	0.719664	-0.260661	0.632797	0.0671141	0.837005	0.648472	142.38	144	51.7181	4.36824	-4.62365	51.2828	172	7.19153	172	1050.83	1057	1114.68	-4.64074	51.4526	389	1190	33.3868	801	0.418393	0.706449	0.362835	0.880674	30.127	0.744713	0.83043	0.267729	1.58542	60.254	0.267729
50	0.463414	0.645671	0.258198	0.84106	29.908	0.704361	0.80587	0.339381	1.83185	59.816	0.339381	2.35403	0.343115	1.56598	0.686243	-0.279733	0.658781	0.0580139	0.839018	0.645671	149.234	150	57.8505	4.726	-3.58885	50.1931	178	7.60595	178	1055.67	1058	1247.44	-3.59178	50.3862	362	1190	35.3191	828	0.37858	0.707144	0.304151	0.875808	30.0008	0.690558	0.793896	0.268519	1.69796	60.0016	0.268519
51	0.493484	0.586418	0.28525	0.826174	29.5061	0.648623	0.777907	0.370163	1.75927	59.0121	0.370163	2.10101	0.349401	1.47241	0.712123	-0.215282	0.576358	0.0401939	0.823792	0.586418	125.662	127	49.2983	4.41787	-4.39425	52.1292	155	7.02127	155	1048.69	1054	1051.96	-4.41214	52.4008	468	1183	32.434	715	0.395684	0.661676	0.327867	0.866435	29.6117	0.623781	0.760971	0.286499	1.61119	59.2233	0.286499
52	0.683458	0.694223	0.232044	0.838272	29.1406	1.12632	1.03414	0.371694	2.03349	58.2811	0.371694	3.82184	0.5377	1.73918	0.740268	-0.341075	0.745226	0.0190792	0.834523	0.694223	149.154	150	81.4324	4.75666	-4.43689	48.4749	192	9.02399	192	1070.34	1077	2068.22	-4.40476	47.9385	321	1286	45.4776	965	0.618108	0.720105	0.247417	0.856033	29.1312	1.12163	1.03129	0.335949	1.97458	58.2623	0.335949
53	0.827028	0.565466	0.133593	0.73198	29.2852	0.999429	0.988492	0.596294	2.41746	58.5704	0.596294	3.17069	0.457146	1.86416	0.910998	-0.167279	0.569749	0.0515536	0.722712	0.565466	124.299	125	69.4886	4.96252	-1.6644	14.8518	156	8.33598	156	1052.19	1055	1520.17	-1.6694	14.8719	470	1199	38.9894	729	0.494769	0.698297	0.19731	0.822049	29.671	0.858538	0.91294	0.381197	2.06226	59.342	0.381197
54	1.14972	0.652515	0.209569	0.782089	29.2973	1.80519	1.25377	0.540945	2.18922	58.5946	0.540945	6.07103	0.822168	1.78374	0.904285	-0.255589	0.676572	0.179165	0.773637	0.652515	111.828	113	113.697	4.86941	-3.84715	30.3292	147	10.6629	147	1047.66	1054	2560.48	-3.84593	30.3323	517	1215	50.6012	698	0.917259	0.688121	0.249534	0.811784	29.4316	1.64174	1.19669	0.463833	2.05716	58.8633	0.463833
55	0.749748	0.505257	0.16746	0.747756	29.9659	0.811794	0.879306	0.554282	2.17154	59.9319	0.554282	2.49743	0.435216	1.67584	0.878971	-0.133391	0.503443	0.0676167	0.740587	0.505257	79.7729	81	50.6978	4.67576	-2.07677	16.8939	109	7.12024	109	1045.31	1049	1079.71	-2.07346	16.903	677	1182	32.8589	505	0.423929	0.658015	0.266699	0.841648	30.2759	0.656288	0.78415	0.337696	1.77871	60.5518	0.337696
56	0.697913	0.572296	0.178464	0.769474	28.928	0.939801	0.912359	0.503453	2.1306	57.8559	0.503453	3.06129	0.431561	1.70212	0.831867	-0.175358	0.56715	0.106592	0.764231	0.572296	104.004	105	43.0983	4.44321	-3.39981	38.753	172	6.56493	172	1065.71	1069	1379.69	-3.40697	38.7835	477	1449	37.1442	972	0.500302	0.658853	0.232259	0.830539	29.3137	0.854711	0.865481	0.367142	1.88358	58.6274	0.367142
57	0.356511	0.68756	0.286213	0.868677	28.9445	0.589284	0.754336	0.278181	1.6953	57.8889	0.278181	2.00063	0.275612	1.48556	0.622104	-0.335296	0.69685	0.0161204	0.86713	0.68756	95.1613	96	36.9928	4.39152	-2.36531	27.732	148	6.08217	148	1050.83	1053	985.394	-2.38379	27.9403	559	1323	31.391	764	0.309513	0.725802	0.327937	0.891578	28.938	0.582537	0.748703	0.232685	1.59578	57.8761	0.232685
58	0.56647	0.5452	0.239585	0.814805	29.792	0.645046	0.784812	0.400194	1.83314	59.5839	0.400194	2.01372	0.400665	1.51837	0.746156	-0.198365	0.568513	0.0483492	0.811882	0.5452	100.353	101	45.263	4.45593	-3.65931	40.2636	129	6.72778	129	1052.8	1056	966.022	-3.69238	40.672	589	1183	31.0809	594	0.421057	0.638942	0.317852	0.867003	29.8948	0.599947	0.753575	0.28931	1.6125	59.7895	0.28931
59	0.348069	0.500776	0.32151	0.839569	29.0874	0.357708	0.594344	0.327065	1.55551	58.1749	0.327065	1.08276	0.238193	1.30617	0.657371	-0.178336	0.503983	0.0681415	0.838527	0.500776	27.5329	28	19.6852	4.05489	-0.606316	7.84189	60	4.4368	60	1060.31	1062	440.996	-0.606858	7.802	930	1212	20.9999	282	0.254258	0.599849	0.386165	0.88133	29.112	0.322402	0.565345	0.241413	1.38605	58.2239	0.241413
60	0.621544	0.597553	0.243422	0.809365	29.5185	0.795928	0.88388	0.422558	1.90539	59.0369	0.422558	2.56217	0.436028	1.56863	0.78738	-0.217628	0.599212	0.089352	0.804975	0.597553	99.1984	100	51.3728	4.47649	-3.65623	31.7664	140	7.16748	140	1064.89	1070	1251.71	-3.67489	31.883	575	1264	35.3795	689	0.462892	0.683275	0.334901	0.867146	29.66	0.738739	0.849597	0.300046	1.65331	59.3201	0.300046
61	1.67154	0.623636	0.145257	0.737295	29.5658	2.40531	1.5158	0.658854	2.42469	59.1316	0.658854	7.94971	1.22137	1.89913	0.981965	-0.201487	0.634708	0.0338363	0.727367	0.623636	173.222	175	201.782	4.97708	-5.97617	54.7256	201	14.205	201	1047.06	1057	4251.69	-5.97745	54.7519	252	1175	65.205	923	1.32215	0.690656	0.190765	0.800524	29.9591	2.34259	1.49501	0.510098	2.18211	59.9183	0.510098
62	0.950046	0.644767	0.146323	0.774249	29.7838	1.36809	1.13064	0.525015	2.32735	59.5677	0.525015	4.52233	0.659499	1.91093	0.864497	-0.281011	0.719073	0.0230715	0.767852	0.644767	103.139	105	127.151	5.17388	-2.64965	19.011	126	11.2761	126	1026.09	1035	2460.5	-2.64349	18.9341	572	1127	49.6034	555	0.926283	0.669895	0.176439	0.801458	29.9516	1.40414	1.13554	0.473579	2.24615	59.9032	0.473579
63	0.971328	0.709698	0.250942	0.82352	30.1587	1.89813	1.29528	0.433318	1.936	60.3174	0.433318	6.62118	0.767506	1.62248	0.801047	-0.278113	0.674642	0.110608	0.8185	0.709698	168.331	170	118.77	4.55354	-6.29254	61.4463	189	10.8981	189	1034.75	1044	2293.52	-6.29259	61.4452	295	1125	47.8907	830	0.749178	0.759132	0.30949	0.865181	30.2454	1.7589	1.24569	0.337433	1.76852	60.4907	0.337433
64	0.705308	0.65901	0.138975	0.761939	26.7328	1.0751	1.0298	0.522669	2.42174	53.4656	0.522669	3.59508	0.421214	1.96318	0.860182	-0.255682	0.698108	0.031386	0.755243	0.65901	67.6776	68	61.9378	4.90447	0.251171	8.70241	134	7.87006	134	1085.06	1086	2025.68	0.245101	8.67482	698	1464	45.0076	766	0.526593	0.724251	0.168169	0.816566	26.9303	0.997811	0.991998	0.398027	2.22108	53.8606	0.398027
65	0.810834	0.650967	0.201676	0.80963	29.9168	1.24781	1.07193	0.447242	2.10146	59.8337	0.447242	4.1804	0.594304	1.75428	0.817317	-0.277654	0.692326	0.0482371	0.804157	0.650967	132.208	133	86.5694	4.77693	-4.01912	34.9513	155	9.30427	155	1040.28	1045	1717.6	-4.02283	35.0144	451	1141	41.444	690	0.693069	0.693656	0.228099	0.838215	30.0542	1.20019	1.05249	0.385072	2.0102	60.1084	0.385072
66	3.9145	0.751719	0.151021	0.712434	28.3099	8.91395	2.77591	0.937793	2.64783	56.6198	0.937793	31.7413	2.9278	2.10451	1.19363	-0.293913	0.754836	1.16e-09	0.695679	0.751719	172.851	179	587.518	5.23947	-4.11883	22.3606	205	24.2388	205	1025.95	1054	12322.1	-4.11861	22.3655	234	1173	111.005	939	3.16073	0.78896	0.188302	0.751089	28.4798	8.43436	2.7014	0.820289	2.53149	56.9595	0.820289
67	0.905935	0.58569	0.241641	0.787956	28.3473	1.26502	1.05747	0.495883	1.99546	56.6947	0.495883	4.15415	0.643427	1.60773	0.859149	-0.189038	0.574485	0.0625321	0.781664	0.58569	96.8754	98	72.0491	4.51088	-4.39931	40.4643	146	8.48817	146	1049.86	1055	1850.74	-4.38972	40.3276	559	1297	43.0202	738	0.664048	0.670433	0.289634	0.842457	28.3415	1.15495	1.01483	0.371913	1.79755	56.6831	0.371913
68	0.308022	0.55367	0.390498	0.862166	29.6799	0.35468	0.591927	0.282181	1.46516	59.3598	0.282181	1.1107	0.225624	1.25315	0.612966	-0.218311	0.53989	0.0422153	0.861227	0.55367	71.6962	72	22.3985	4.12506	-1.37586	14.8626	101	4.73271	101	1044.97	1047	475.063	-1.38589	14.9852	714	1182	21.7959	468	0.226928	0.635455	0.465537	0.901209	29.7182	0.32555	0.563545	0.20306	1.27588	59.4364	0.20306
69	0.886868	0.673011	0.138761	0.755094	29.2464	1.44189	1.17437	0.55891	2.46977	58.4928	0.55891	4.88069	0.561064	1.98295	0.903858	-0.247438	0.697391	0.137059	0.747327	0.673011	86.4389	88	100.405	5.09012	-2.25808	14.4873	117	10.0202	117	1052.2	1059	2187.83	-2.26566	14.5446	648	1197	46.7743	549	0.6597	0.738793	0.185222	0.810146	29.4012	1.33464	1.12642	0.428925	2.25971	58.8023	0.428925
70	0.344543	0.558807	0.294398	0.840288	29.9468	0.405503	0.63349	0.325522	1.63112	59.8935	0.325522	1.27747	0.236764	1.37788	0.659383	-0.205985	0.54919	0.0352685	0.839141	0.558807	25.7916	26	25.3498	4.28164	-0.784945	5.12597	56	5.03486	56	1041.16	1044	539.592	-0.788719	5.15997	922	1183	23.2291	261	0.240375	0.650821	0.382726	0.884807	30.0028	0.357258	0.593966	0.232843	1.42528	60.0057	0.232843
71	0.450739	0.613302	0.315983	0.849193	28.8459	0.627633	0.76098	0.324075	1.65547	57.6918	0.324075	2.05979	0.339671	1.41315	0.670118	-0.250299	0.604963	0.0690712	0.847211	0.613302	125.027	126	38.5334	4.19592	-5.10324	71.4981	168	6.20753	168	1038.02	1041	914.415	-5.11973	71.7713	428	1249	30.2393	821	0.360279	0.678399	0.37716	0.885298	28.9344	0.600288	0.742642	0.249966	1.50807	57.8687	0.249966
72	0.594276	0.548516	0.207835	0.780142	28.3436	0.690529	0.821995	0.471769	2.04618	56.6873	0.471769	2.16784	0.366039	1.64093	0.813682	-0.173317	0.553568	0.0623643	0.775482	0.548516	68.3063	69	38.6277	4.47936	-1.1037	14.7205	124	6.21512	124	1083.27	1086	1122.75	-1.1102	14.8793	714	1384	33.5075	670	0.440551	0.628781	0.243485	0.827264	28.5033	0.628112	0.781978	0.364959	1.85244	57.0066	0.364959
73	0.784658	0.757093	0.174457	0.804546	29.7371	1.75221	1.24977	0.452192	2.26134	59.4741	0.452192	6.2242	0.563628	1.89926	0.823876	-0.32572	0.758939	9.88e-10	0.798786	0.757093	111.051	113	111.046	4.92629	-3.89804	30.5268	136	10.5378	136	1074.79	1083	2394.93	-3.90065	30.5374	559	1189	48.938	630	0.630116	0.796379	0.202057	0.83814	29.7809	1.66442	1.22116	0.374811	2.13918	59.5619	0.374811
74	1.26814	0.528467	0.155442	0.729441	29.6124	1.41201	1.13993	0.660011	2.38449	59.2248	0.660011	4.3799	0.800043	1.85848	0.986226	-0.194471	0.620693	0.104462	0.717796	0.528467	116.33	118	123.74	5.12005	-2.77636	19.138	141	11.1238	141	1056.22	1065	2561.94	-2.77812	19.1776	526	1167	50.6156	641	1.09742	0.595361	0.185211	0.77132	29.8602	1.38328	1.12657	0.562264	2.28876	59.7205	0.562264
75	0.657239	0.579716	0.230232	0.805801	29.5988	0.819034	0.883758	0.436969	1.97216	59.1976	0.436969	2.6189	0.457371	1.61184	0.814038	-0.206715	0.59287	0.0953605	0.80039	0.579716	72.7044	73	34.6913	4.25293	-2.29935	23.4589	145	5.88993	145	1062.51	1067	1152.37	-2.30864	23.5112	643	1477	33.9466	834	0.466844	0.665088	0.278465	0.849536	29.5616	0.724306	0.832229	0.333001	1.80032	59.1232	0.333001
76	0.439033	0.630281	0.240804	0.831179	29.7891	0.59947	0.764549	0.356574	1.84347	59.5782	0.356574	1.95885	0.305969	1.56038	0.703893	-0.259065	0.639532	0.0902807	0.82882	0.630281	86.889	88	40.5915	4.51474	-1.81913	14.2337	113	6.37114	113	1060.21	1064	864.116	-1.83363	14.2876	659	1182	29.3958	523	0.334743	0.693296	0.33495	0.869857	29.9925	0.54349	0.72226	0.274483	1.64135	59.9851	0.274483
77	0.325416	0.723942	0.276475	0.866136	29.1853	0.61515	0.776106	0.277892	1.7436	58.3706	0.277892	2.13519	0.246004	1.52937	0.617234	-0.346638	0.713315	0.0396269	0.864916	0.723942	129.272	130	42.6251	4.60714	-1.86372	21.4647	169	6.52879	169	1070.72	1074	1034.38	-1.8761	21.7439	432	1265	32.1617	833	0.252553	0.777304	0.323112	0.895346	29.3045	0.589552	0.758939	0.217258	1.6137	58.6091	0.217258
78	1.35748	0.704542	0.171401	0.788971	28.9824	2.56014	1.53743	0.540701	2.35976	57.9649	0.540701	8.88308	1.04819	1.94879	0.916885	-0.307091	0.748102	0.0324929	0.781042	0.704542	164.122	167	173.779	5.08321	-4.88888	42.6382	203	13.1825	203	1070.09	1082	4217.45	-4.89126	42.6863	261	1262	64.9419	1001	1.05231	0.752869	0.212294	0.82265	28.9164	2.38157	1.48403	0.451839	2.22615	57.8327	0.451839
79	1.15542	0.695114	0.14909	0.730584	29.8532	2.08402	1.38206	0.644557	2.462	59.7065	0.644557	7.18065	0.725384	1.92945	0.992697	-0.222448	0.670394	0.128835	0.719023	0.695114	124.909	128	143.313	5.02396	-3.37772	23.1674	146	11.9713	146	1030	1042	2748	-3.37985	23.1339	483	1121	52.4213	638	0.900208	0.752949	0.209838	0.785075	30.0754	1.95336	1.33389	0.512692	2.22605	60.1507	0.512692
80	0.693542	0.692903	0.243893	0.813265	27.8745	1.32604	1.10099	0.42785	2.00562	55.7491	0.42785	4.61062	0.501177	1.66873	0.807498	-0.256581	0.658351	0.0718622	0.808054	0.692903	110.538	112	74.5975	4.55008	-3.99873	35.2441	166	8.63699	166	1040.3	1047	2011.67	-4.00256	35.2509	466	1330	44.8517	864	0.52935	0.74659	0.293823	0.850754	27.89	1.22656	1.05694	0.34087	1.85287	55.7799	0.34087
81	0.453219	0.742039	0.195799	0.82872	28.9181	0.893186	0.942287	0.365117	2.09956	57.8362	0.365117	3.11953	0.316855	1.80791	0.723976	-0.352642	0.764566	0.0930618	0.825703	0.742039	63.0158	64	77.2427	5.04715	-0.488884	6.36712	95	8.78878	95	1063.55	1066	1742.8	-0.494024	6.40801	764	1217	41.7468	453	0.380727	0.77593	0.220359	0.854804	28.7267	0.862178	0.926234	0.3095	2.00101	57.4534	0.3095
82	0.555058	0.734869	0.302565	0.839756	30.1995	1.23601	1.06051	0.362212	1.8601	60.399	0.362212	4.389	0.415936	1.57345	0.741666	-0.301777	0.686059	0.088709	0.835135	0.734869	94.6784	97	72.999	4.48367	-3.82378	27.0139	125	8.54395	125	1057.43	1066	1601.68	-3.82184	27.011	614	1199	40.021	585	0.457065	0.773957	0.325352	0.861481	30.2998	1.19333	1.04129	0.311263	1.79518	60.5997	0.311263
83	0.925833	0.652053	0.121673	0.742065	29.8629	1.38596	1.14861	0.588353	2.48797	59.7259	0.588353	4.61801	0.566758	1.99329	0.913295	-0.252222	0.706467	0.0602363	0.733454	0.652053	123.356	124	112.779	5.16881	-2.68649	25.6863	153	10.6197	153	1078.46	1083	2543.87	-2.70649	25.8806	492	1217	50.4368	725	0.808534	0.685812	0.144841	0.773878	30.0537	1.33782	1.12776	0.512235	2.35541	60.1073	0.512235
84	0.58475	0.607592	0.211913	0.803839	29.3457	0.752745	0.862734	0.429642	2.01778	58.6915	0.429642	2.42623	0.393744	1.65847	0.79771	-0.225528	0.622721	0.0376942	0.799071	0.607592	68.8245	70	44.4167	4.49344	-2.11637	16.4205	119	6.66459	119	1055.45	1060	1163.63	-2.12152	16.4259	703	1311	34.1121	608	0.495439	0.656716	0.246697	0.832595	29.3033	0.724709	0.846135	0.36605	1.90764	58.6067	0.36605
85	0.585238	0.670609	0.24743	0.832653	29.4271	0.850599	0.892089	0.373495	1.92677	58.8542	0.373495	2.81716	0.432968	1.63531	0.735093	-0.29321	0.688191	0.0603537	0.828901	0.670609	94.0793	95	59.1119	4.66933	-3.08774	30.8496	130	7.68843	130	1065.38	1069	1383.3	-3.09445	30.8812	610	1239	37.1928	629	0.462156	0.717122	0.269193	0.858528	29.4832	0.793562	0.865102	0.312789	1.82494	58.9664	0.312789
86	1.41446	0.536277	0.0879765	0.662755	29.3754	1.65739	1.26041	0.823105	2.84563	58.7507	0.823105	5.21511	0.719704	2.0702	1.10464	-0.138679	0.566051	0.106718	0.641595	0.536277	109.682	111	114.768	5.2206	-1.97597	12.9547	135	10.713	135	1055.13	1062	2400.86	-1.97422	12.9754	553	1172	48.9986	619	0.847217	0.686517	0.136057	0.753533	30.0223	1.44085	1.16268	0.560868	2.46641	60.0446	0.560868
87	0.350007	0.678022	0.267107	0.859905	30.2238	0.657976	0.77116	0.290167	1.71797	60.4476	0.290167	2.2819	0.26168	1.50902	0.61255	-0.319681	0.675009	0.0173887	0.859185	0.678022	113.697	114	68.2641	4.94916	-1.84346	22.073	139	8.26221	139	1046.63	1047	1402.34	-1.8442	22.0829	531	1161	37.4478	630	0.287736	0.721837	0.318462	0.887644	30.3652	0.628484	0.747062	0.233982	1.59188	60.7303	0.233982
88	0.460125	0.642044	0.263361	0.838173	29.0903	0.641819	0.794154	0.351057	1.85777	58.1806	0.351057	2.10715	0.330824	1.56064	0.718109	-0.27044	0.655399	0.095305	0.834531	0.642044	55.7328	56	34.0471	4.35632	-1.12555	14.8601	107	5.83499	107	1075.46	1078	941.923	-1.13347	14.9505	782	1348	30.6908	566	0.324619	0.723598	0.314845	0.878691	29.114	0.582179	0.756652	0.260193	1.66961	58.228	0.260193
89	0.551197	0.663904	0.274549	0.851817	29.6988	0.834935	0.900017	0.332218	1.81894	59.3977	0.332218	2.78854	0.436462	1.56916	0.691642	-0.316375	0.697052	0.00949497	0.848994	0.663904	127.618	129	59.394	4.53835	-4.37366	46.9191	161	7.70675	161	1038.19	1043	1285.36	-4.41704	47.5736	443	1194	35.8519	751	0.476778	0.705428	0.306306	0.87774	29.7148	0.824649	0.893941	0.278893	1.72283	59.4296	0.278893
90	0.850091	0.7964	0.174312	0.817579	28.2626	2.43318	1.45111	0.439209	2.37847	56.5252	0.439209	8.88264	0.635882	2.01634	0.818442	-0.374076	0.804774	0.0774926	0.811503	0.7964	123.279	125	139.16	5.22752	-3.03104	23.7368	184	11.7966	184	1027.13	1034	3856.69	-3.03511	23.7792	378	1348	62.1022	970	0.692364	0.829288	0.199505	0.843594	28.379	2.34849	1.42143	0.376114	2.27043	56.7581	0.376114
91	0.459005	0.571817	0.251216	0.815372	29.0362	0.582921	0.748583	0.386874	1.81924	58.0725	0.386874	1.87268	0.304589	1.50861	0.727098	-0.197055	0.561672	0.0864117	0.813024	0.571817	84.846	86	35.8339	4.41038	-1.90193	17.3631	133	5.98614	133	1053.2	1057	915.964	-1.91706	17.5528	623	1298	30.2649	675	0.294555	0.691002	0.371123	0.884703	29.2008	0.518091	0.702205	0.242822	1.52456	58.4017	0.242822
92	0.423422	0.550364	0.317486	0.839425	27.3619	0.505082	0.697817	0.341284	1.66522	54.7239	0.341284	1.59691	0.301433	1.39246	0.692752	-0.211944	0.558327	0.0574211	0.836884	0.550364	65.1877	66	29.6527	4.22016	-1.2136	18.8392	126	5.44543	126	1062.7	1066	876.523	-1.2161	18.8883	708	1393	29.6061	685	0.351514	0.630608	0.360027	0.878654	27.3376	0.504781	0.695186	0.263569	1.53142	54.6751	0.263569
93	0.742601	0.618645	0.25812	0.819928	29.4351	1.03891	0.976157	0.419728	1.90883	58.8703	0.419728	3.41302	0.554657	1.59365	0.79155	-0.253209	0.641902	0.124962	0.814884	0.618645	103.643	105	63.9051	4.4754	-3.90357	37.0138	155	7.99407	155	1040.26	1045	1647.62	-3.92306	37.2657	514	1300	40.5909	786	0.634205	0.667289	0.28742	0.846479	29.5664	1.01664	0.962826	0.361407	1.83745	59.1329	0.361407
94	0.888561	0.56467	0.235102	0.794786	29.14	1.09163	0.987592	0.477397	1.99357	58.28	0.477397	3.47797	0.643099	1.61599	0.834227	-0.196967	0.583945	0.0502541	0.78935	0.56467	134.346	136	70.7364	4.59444	-4.31669	42.0254	193	8.4105	193	1054.37	1061	2019.93	-4.32841	42.2125	336	1369	44.9437	1033	0.651341	0.665238	0.285829	0.848294	29.2847	1.00704	0.948824	0.354715	1.80581	58.5695	0.354715
95	0.610054	0.56708	0.299316	0.829925	28.3621	0.767681	0.842198	0.379521	1.7155	56.7242	0.379521	2.46067	0.457108	1.42925	0.737043	-0.207982	0.559903	0.0791129	0.826558	0.56708	60.5384	61	24.0699	3.79404	0.101029	85.4401	171	4.90611	171	1082.48	1085	1331.29	0.11967	86.5428	631	1909	36.4869	1278	0.436064	0.648611	0.380377	0.874893	28.417	0.696396	0.799788	0.280907	1.53126	56.8339	0.280907
96	0.760752	0.627657	0.178524	0.768914	29.6366	1.12008	1.0332	0.5218	2.22916	59.2732	0.5218	3.71956	0.477712	1.79595	0.888557	-0.216674	0.633926	0.0327493	0.761123	0.627657	87.6827	89	84.1427	4.85524	-2.59427	15.7561	113	9.17293	113	1054.45	1060	1764.34	-2.59264	15.7482	653	1172	42.004	519	0.572976	0.700383	0.239646	0.825153	29.82	1.05028	0.99819	0.394201	1.99776	59.64	0.394201
97	0.371527	0.581382	0.274053	0.827355	30.2236	0.45905	0.673678	0.351849	1.74395	60.4473	0.351849	1.46467	0.243547	1.47076	0.677126	-0.219048	0.578889	0.0507973	0.826043	0.581382	23.5528	24	30.0427	4.42942	-0.60455	4.4264	45	5.48113	45	1072.95	1075	630.408	-0.604666	4.41731	965	1173	25.1079	208	0.270326	0.676373	0.312482	0.870565	30.3703	0.43086	0.653534	0.261734	1.60078	60.7405	0.261734
98	0.874361	0.566796	0.150346	0.750751	29.7605	1.07008	1.01597	0.566686	2.30621	59.521	0.566686	3.40596	0.543476	1.82449	0.908101	-0.188629	0.604349	0.0507973	0.742787	0.566796	78.7462	80	71.1271	4.78626	-2.49931	17.3959	116	8.43369	116	1055.78	1061	1662.22	-2.50583	17.4505	675	1238	40.7704	563	0.638365	0.650842	0.210621	0.812323	29.8891	0.96561	0.963782	0.422286	2.05882	59.7782	0.422286
99	0.467539	0.508073	0.274285	0.813809	29.5635	0.490427	0.694186	0.391457	1.72736	59.1269	0.391457	1.49417	0.311315	1.42184	0.733064	-0.167763	0.509308	0.112912	0.811226	0.508073	58.4007	59	28.3121	4.22878	-1.83614	17.0132	92	5.32091	92	1066.89	1068	646.581	-1.84714	17.1017	787	1227	25.428	440	0.320795	0.608241	0.364045	0.866405	29.7777	0.420822	0.640078	0.279015	1.51201	59.5555	0.279015
100	0.693353	0.702226	0.242425	0.832943	29.3166	1.2292	1.06745	0.388896	1.94427	58.6331	0.388896	4.22346	0.530885	1.64026	0.765102	-0.293919	0.69008	0.120652	0.828374	0.702226	121.106	122	74.6421	4.65774	-4.45127	41.3771	154	8.63957	154	1051.9	1057	1660.82	-4.45862	41.4819	480	1209	40.7532	729	0.55523	0.746412	0.275521	0.861845	29.4996	1.16169	1.04	0.322305	1.84879	58.9991	0.322305
101	0.555989	0.599618	0.242401	0.822666	29.079	0.726297	0.816105	0.387505	1.89196	58.158	0.387505	2.3492	0.394246	1.5806	0.74096	-0.239311	0.624519	0.0520412	0.819198	0.599618	119.345	120	53.2214	4.62072	-3.2788	37.6405	153	7.2953	153	1063.2	1068	1212.38	-3.28819	37.6698	493	1223	34.8192	730	0.46302	0.658927	0.275851	0.854757	29.2729	0.691455	0.799565	0.319126	1.76043	58.5459	0.319126
102	1.09716	0.717987	0.162846	0.771447	28.8829	1.98312	1.37575	0.565939	2.47955	57.7658	0.565939	6.83531	0.752286	2.00593	0.954982	-0.288798	0.742065	0.0866594	0.76055	0.717987	110.946	113	139.818	5.23298	-2.31221	12.85	151	11.8245	151	1049.98	1061	3310.79	-2.31646	12.8808	510	1246	57.5395	736	0.919684	0.750281	0.182847	0.798513	29.0045	1.9044	1.34981	0.497163	2.37711	58.009	0.497163
103	0.493785	0.633273	0.219651	0.820441	28.9742	0.687809	0.820827	0.38311	1.92805	57.9485	0.38311	2.25745	0.341652	1.6302	0.732831	-0.258878	0.652452	0.0788149	0.817745	0.633273	77.5002	78	40.6349	4.43841	-2.54164	22.9424	127	6.37455	127	1041.5	1046	1021.97	-2.58024	23.3962	651	1290	31.9683	639	0.368273	0.715403	0.282044	0.873437	29.1288	0.659462	0.803444	0.272778	1.71771	58.2577	0.272778
104	0.483353	0.616653	0.263562	0.824868	29.7965	0.662974	0.799116	0.371335	1.82573	59.5931	0.371335	2.16854	0.340881	1.53416	0.71465	-0.236256	0.613128	0.0438007	0.822602	0.616653	127.538	128	43.2852	4.46427	-3.36275	38.6034	156	6.57915	156	1055.39	1059	924.116	-3.38151	38.8743	465	1185	30.3993	720	0.349515	0.704854	0.31284	0.87152	29.9971	0.613612	0.767698	0.27187	1.65207	59.9942	0.27187
105	0.565334	0.654763	0.344788	0.862417	29.4664	0.892352	0.899077	0.319016	1.66821	58.9328	0.319016	3.00407	0.457159	1.4212	0.686342	-0.291731	0.650912	0.0645759	0.858784	0.654763	138.959	140	63.3189	4.46903	-5.21773	59.5646	171	7.95732	171	1058.77	1063	1412.39	-5.21974	59.5572	402	1210	37.5818	808	0.470005	0.699416	0.368458	0.879538	29.5296	0.84304	0.872649	0.27851	1.61098	59.0592	0.27851
106	0.837361	0.653466	0.292706	0.817907	30.2381	1.3522	1.11566	0.436526	1.86278	60.4761	0.436526	4.57144	0.639954	1.54384	0.820087	-0.239771	0.622091	0.0645743	0.812016	0.653466	101.694	103	96.3956	4.52416	-4.74355	35.4641	125	9.81812	125	1033.71	1041	1903.74	-4.7438	35.4507	582	1137	43.6319	555	0.689732	0.693183	0.357578	0.850825	30.4124	1.27422	1.08141	0.361376	1.71168	60.8247	0.361376
107	0.849265	0.657243	0.165913	0.770137	29.197	1.33666	1.12473	0.515661	2.28049	58.394	0.515661	4.49739	0.578245	1.84251	0.857187	-0.222318	0.649599	0.0467675	0.764596	0.657243	161.756	163	90.3874	4.8488	-4.91407	56.3915	202	9.50723	202	1070.95	1076	2224.01	-4.91367	56.4796	268	1271	47.1594	1003	0.594592	0.743649	0.240092	0.845814	29.3612	1.23104	1.07578	0.348259	1.98728	58.7224	0.348259
108	1.1122	0.624266	0.196915	0.787306	29.6552	1.63181	1.24577	0.525221	2.20637	59.3104	0.525221	5.41502	0.828112	1.79565	0.909582	-0.244827	0.666569	0.0707312	0.779435	0.624266	161.038	163	121.215	4.90832	-4.03434	32.4155	193	11.0098	193	1040.59	1049	2617.01	-4.04682	32.5185	292	1190	51.1567	898	0.940654	0.673524	0.256793	0.827743	29.7723	1.57452	1.22439	0.434236	2.0564	59.5446	0.434236
109	0.578346	0.678885	0.206538	0.818736	30.0692	0.922507	0.924567	0.393297	2.00102	60.1383	0.393297	3.11168	0.414659	1.70339	0.732025	-0.292747	0.696276	0.029145	0.816139	0.678885	143.435	145	73.8908	4.77991	-3.8908	40.1012	165	8.59598	165	1028.32	1034	1423.15	-3.90524	40.2296	398	1125	37.7246	727	0.437454	0.745695	0.286933	0.873349	30.1952	0.8552	0.886094	0.280698	1.76769	60.3903	0.280698
110	0.543743	0.547082	0.21742	0.79321	27.6847	0.629877	0.782027	0.437128	1.92383	55.3693	0.437128	1.97576	0.347823	1.56833	0.765064	-0.177143	0.546261	0.0591879	0.790233	0.547082	99.4081	100	33.0855	4.32875	-2.36515	39.8185	167	5.752	167	1067.99	1069	1059.85	-2.36993	39.9309	505	1450	32.5553	945	0.374063	0.653987	0.279725	0.854038	27.8907	0.563076	0.737929	0.306786	1.68932	55.7814	0.306786
111	0.795701	0.601952	0.281307	0.831437	27.7006	1.05684	0.986708	0.400271	1.81121	55.4013	0.400271	3.43166	0.623468	1.51561	0.771271	-0.257569	0.633437	0.0198327	0.82656	0.601952	82.1105	83	29.6092	3.6205	-2.25844	87.9531	210	5.44143	210	1068.27	1075	2068.27	-2.25631	89.2095	381	2143	45.4782	1762	0.593417	0.658851	0.380563	0.871425	27.4454	0.936944	0.927192	0.308185	1.58509	54.8909	0.308185
112	0.730928	0.661402	0.221481	0.820217	29.8176	1.20049	1.05089	0.413476	1.99785	59.6353	0.413476	4.07103	0.55167	1.68444	0.781948	-0.277969	0.679399	0.0385205	0.815925	0.661402	150.701	152	83.2823	4.64198	-4.61562	42.0806	182	9.12591	182	1045.77	1053	1807.31	-4.62196	42.1731	343	1194	42.5124	851	0.591789	0.721803	0.277748	0.859841	29.9744	1.16513	1.03736	0.328841	1.85278	59.9488	0.328841
113	0.53479	0.653035	0.212522	0.802014	30.2224	0.814647	0.891063	0.423219	2.03687	60.4449	0.423219	2.7238	0.351734	1.69422	0.772424	-0.244779	0.648881	0.106715	0.798344	0.653035	76.7664	78	52.8043	4.66977	-1.81757	11.777	101	7.26666	101	1045.45	1052	1073.86	-1.82587	11.7798	699	1155	32.7699	456	0.354443	0.737788	0.299561	0.863233	30.4746	0.723729	0.841036	0.289908	1.78424	60.9491	0.289908
114	0.757735	0.506142	0.153476	0.740527	30.0514	0.822482	0.879036	0.570656	2.25601	60.1028	0.570656	2.53219	0.418023	1.73751	0.886478	-0.139429	0.520228	0.0814817	0.732301	0.506142	61.9859	63	57.202	4.79411	-1.59009	10.3498	82	7.5632	82	1051.78	1056	1132.24	-1.5933	10.3669	776	1139	33.6488	363	0.442092	0.652104	0.234424	0.820413	30.4225	0.668917	0.789257	0.377027	1.9022	60.845	0.377027
115	0.656764	0.640203	0.211157	0.798447	28.6162	0.968235	0.961393	0.44601	2.06327	57.2324	0.44601	3.21618	0.446483	1.70408	0.797449	-0.245853	0.65397	0.0364281	0.793802	0.640203	106.18	107	56.743	4.73243	-2.0053	21.4573	184	7.53279	184	1043.41	1046	1954.32	-2.01162	21.5468	420	1503	44.2077	1083	0.505115	0.717085	0.258046	0.850143	28.8402	0.940255	0.948731	0.334265	1.8862	57.6805	0.334265
116	0.640032	0.702676	0.183964	0.795784	29.9781	1.09067	1.02473	0.452939	2.17734	59.9562	0.452939	3.72264	0.425019	1.79521	0.820961	-0.269698	0.694253	0.106941	0.790128	0.702676	79.4504	81	66.8036	4.73719	-2.25465	13.0242	108	8.17334	108	1017.08	1025	1338.19	-2.25498	13.0162	662	1144	36.5813	482	0.462272	0.765478	0.263409	0.843441	30.2165	0.993619	0.976066	0.34338	1.96115	60.4331	0.34338
[truncated: 202 more columns]
